# Supplementary material
Source: PubMed Central journal article supplement (PMC2849705)
Supplement: supp_M900286-MCP200_Supplemental_Table_2.pdf [file supp_M900286-MCP200_Supplemental_Table_2.pdf]

**Supplemental Table 2.** Database Search Results of spectra acquired on the prOTOF MALDI O-TOF Mass Spectrometry using TOFworks™, an integrated workflow-based software platform. Monoisotopic peptide peak lists were generated in the mass range  $m/z$  500–5000, with a signal to noise ratio threshold of 3.0, and peak resolution threshold of 10,000 using peak picking algorithm of the TOFworks software version 1.0.1.797. Trypsin autolysis fragment peaks and peaks from the matrix were not excluded unless and otherwise stated. The resulting peptide mass lists were used to search the sequences present in an indexed rat subset database (36,274 sequences), created from NCBI nr 3,893,302 sequences (release 07/04/06) and stored locally, by running ProFound™ search engine V 2003.6.2.1 (Genomic Solutions, Ann Arbor, MI). The searching criteria used were (1) Protein molecular weight search window of 10 to 300 KDa; (2) protein expectation  $P < 0.001$ ; (3) minimum sequence coverage of 10%; (4) peptide mass tolerance limits of 30 parts per million (ppm); (5) complete cysteine modification by iodoacetamide (57 Da) and partial methionine oxidation (M)(16 Da). A positive identification was accepted when a minimum of 6 peptide masses matched a particular protein with a mass error tolerance of  $\leq 30$  ppm, and sequence coverage  $\geq 10\%$ , and low expectation value ( $P < 0.001$ ).

| Pos.     | Gene name   | Accession number | Expect.         | % seq. cove. | No. matched peak | No. unmatched peak | MALDI-TOF MS          |                   |                  |                          |
|----------|-------------|------------------|-----------------|--------------|------------------|--------------------|-----------------------|-------------------|------------------|--------------------------|
|          |             |                  |                 |              |                  |                    | Measured mass (M + H) | Match error (ppm) | Peptide Sequence | Modification             |
| 8        | <i>apoE</i> | P02650           | 1.30E-07        | 36           | 17               | 10                 | 899.431               | -2                | FWDYLR           |                          |
|          |             |                  |                 |              |                  |                    | 968.542               | -2                | LGPLVEQGR        |                          |
|          |             |                  |                 |              |                  |                    | 1019.477              | 2                 | LGADMEDLR        |                          |
|          |             |                  |                 |              |                  |                    | 1035.470              | 0                 | LGADM#EDLR       | 1 Oxidation (M)          |
|          |             |                  |                 |              |                  |                    | 1075.583              | 1                 | LQAEIFQAR        |                          |
|          |             |                  |                 |              |                  |                    | 1162.546              | 2                 | MEEQTQQIR        |                          |
|          |             |                  |                 |              |                  |                    | 1178.541              | 2                 | M#EEQTQQIR       | 1 Oxidation (M)          |
|          |             |                  |                 |              |                  |                    | 1228.633              | 2                 | GRLEEVGNQAR      |                          |
|          |             |                  |                 |              |                  |                    | 1239.674              | 2                 | TANLGAGAAQPLR    |                          |
|          |             |                  |                 |              |                  |                    | 1377.672              | 1                 | SKMEEQTQQIR      |                          |
|          |             |                  |                 |              |                  |                    | 1393.666              | 0                 | SKM#EEQTQQIR     | 1 Oxidation (M)          |
|          |             |                  |                 |              |                  |                    | 1510.803              | 2                 | TANLGAGAAQPLRDR  |                          |
|          |             |                  |                 |              |                  |                    | 1599.780              | 1                 | ELEEQLGPVAEETR   |                          |
|          |             |                  |                 |              |                  |                    | 1720.812              | 2                 | NEVNTMLGQSTEELR  |                          |
|          |             |                  |                 |              |                  |                    | 1736.806              | 1                 | NEVNTM#LGQSTEELR | 1 Oxidation (M)          |
| 1817.876 | 2           | DRLEEVREQMEEVR   |                 |              |                  |                    |                       |                   |                  |                          |
| 1833.873 | 3           | DRLEEVREQM#EEVR  | 1 Oxidation (M) |              |                  |                    |                       |                   |                  |                          |
| 9        | <i>Bpgm</i> | Q6P6G4           | 5.00E-05        | 42           |                  |                    | 955.420               | -10               | HGEGQWVK         |                          |
|          |             |                  |                 |              |                  |                    | 1068.461              | -7                | FC*SWVDQK        | Carbamidomethylation (C) |
|          |             |                  |                 |              |                  |                    | 1103.518              | -6                | LNSDGLLEEAR      |                          |
|          |             |                  |                 |              |                  |                    | 1113.599              | -9                | HYGALIGLNR       |                          |

|    |              |             |          |    |    |    |          |     |                            |                          |
|----|--------------|-------------|----------|----|----|----|----------|-----|----------------------------|--------------------------|
|    |              |             |          |    |    |    | 1175.609 | -9  | SESLKDVLER                 |                          |
|    |              |             |          |    |    |    | 1241.644 | -6  | TVLISAHGNSSR               |                          |
|    |              |             |          |    |    |    | 1283.601 | -6  | MALNHGEEQVR                |                          |
|    |              |             |          |    |    |    | 1299.596 | -5  | M#ALNHGEEQVR               | 1 Oxidation (M)          |
|    |              |             |          |    |    |    | 1311.655 | -8  | VCDVPLDQLPR                | Carbamidomethylation (C) |
|    |              |             |          |    |    |    | 1354.611 | -4  | HGEGQWNKENR                |                          |
|    |              |             |          |    |    |    | 1602.816 | -4  | YKVC DVPLDQLPR             | Carbamidomethylation (C) |
|    |              |             |          |    |    |    | 1898.985 | -4  | ALNFEFDLVFTSILNR           |                          |
|    |              |             |          |    |    |    | 2788.292 | 0   | SYNVTPPPPIEESHPPFFHEIYNDR  |                          |
|    |              |             |          |    |    |    | 2944.392 | 0   | SYNVTPPPPIEESHPPFFHEIYNDRR |                          |
|    |              |             |          |    |    |    | 2944.392 |     | RSYNVTPPPPIEESHPPFFHEIYNDR |                          |
| 13 | <i>Car1</i>  | gi 27689031 | 4.00E-07 | 51 | 9  | 15 | 931.417  | -2  | NGPDQWSK                   |                          |
|    |              |             |          |    |    |    | 935.448  | -2  | GGPLADSYR                  |                          |
|    |              |             |          |    |    |    | 1026.497 | -5  | YSSAAEAISK                 |                          |
|    |              |             |          |    |    |    | 1037.567 | 1   | VGPANPNLQK                 |                          |
|    |              |             |          |    |    |    | 1570.836 | 1   | ESISLSPEQLAQLR             |                          |
|    |              |             |          |    |    |    | 1640.811 | 1   | YSGELHLVHWNSAK             |                          |
|    |              |             |          |    |    |    | 1900.968 | 0   | HDSSLKPVSVSYNPATAK         |                          |
|    |              |             |          |    |    |    | 2593.399 | -1  | GLLSSAEGEPAVPVLSNHRPPQPLK  |                          |
|    |              |             |          |    |    |    | 2721.214 | 2   | LTQFHFHWGNSNDHGSEHTVDGAK   |                          |
| 24 | <i>Fetub</i> | Q9QX79      | 5.83E-04 | 17 | 8  | 17 | 837.465  | 18  | SPGVPPQR                   |                          |
|    |              |             |          |    |    |    | 1000.448 | 16  | SPEC*PGPEK                 |                          |
|    |              |             |          |    |    |    | 1082.553 | 29  | DGYMLTLNR                  |                          |
|    |              |             |          |    |    |    | 1098.534 | 16  | DGYM#LTLNR                 | 1 Oxidation (M)          |
|    |              |             |          |    |    |    | 1115.586 | 14  | AM#FHVNKPR                 | 1 Oxidation (M)          |
|    |              |             |          |    |    |    | 1381.677 | 20  | IFYETVHGQC*K               |                          |
|    |              |             |          |    |    |    | 1822.878 | 23  | GSIQHLPEQEPEPDSK           |                          |
|    |              |             |          |    |    |    | 2007.995 | 21  | GSIQHLPEQEPEPDSK GK        |                          |
| 25 | <i>Fga</i>   | P06399      | 1.21E-06 | 19 | 13 | 13 | 998.481  | -5  | NSLDFDQK                   |                          |
|    |              |             |          |    |    |    | 1055.604 | -9  | AQQIQVLQK                  |                          |
|    |              |             |          |    |    |    | 1215.642 | -7  | GDKELLIGNEK                |                          |
|    |              |             |          |    |    |    | 1298.622 | -6  | SQLQEGPPEWK                |                          |
|    |              |             |          |    |    |    | 1374.681 | -6  | QMRMELERPGK                |                          |
|    |              |             |          |    |    |    | 1390.669 | -12 | QM#RMELERPGK               | 1 Oxidation (M)          |
|    |              |             |          |    |    |    | 1438.630 | -3  | MHPELG SFYDSR              |                          |
|    |              |             |          |    |    |    | 1454.623 | -4  | M#HPELG SFYDSR             | 1 Oxidation (M)          |
|    |              |             |          |    |    |    | 1464.709 | -11 | EINLKDYEGQQK               |                          |

|    |            |                |           |    |    |    |          |     |                                 |                          |
|----|------------|----------------|-----------|----|----|----|----------|-----|---------------------------------|--------------------------|
|    |            |                |           |    |    |    | 1492.690 | -3  | GLIDEANQDFTNR                   |                          |
|    |            |                |           |    |    |    | 1717.689 | -6  | MADEAASEAHQEGDTR                |                          |
|    |            |                |           |    |    |    | 1733.690 | -3  | M#ADEAASEAHQEGDTR               | 1 Oxidation (M)          |
|    |            |                |           |    |    |    | 1767.805 | -11 | M#KGLIDEANQDFTNR                | 1 Oxidation (M)          |
| 27 | <i>Fgg</i> | P02680         | 1.911E-04 | 30 | 12 | 22 | 759.430  | -18 | IIPFNR                          |                          |
|    |            |                |           |    |    |    | 1050.506 | -8  | VGPESDKYR                       |                          |
|    |            |                |           |    |    |    | 1162.506 | -5  | TSTADYAMFR                      |                          |
|    |            |                |           |    |    |    | 1178.503 | -3  | TSTADYAM#FR                     | 1 Oxidation (M)          |
|    |            |                |           |    |    |    | 1244.599 | -7  | YLQDIYTSNK                      |                          |
|    |            |                |           |    |    |    | 1531.796 | -5  | YEALLTHESSIR                    |                          |
|    |            |                |           |    |    |    | 1551.715 | -6  | LSIGDGQQHHMGGSK                 |                          |
|    |            |                |           |    |    |    | 1567.714 | -4  | LSIGDGQQHHM#GGSK                | 1 Oxidation (M)          |
|    |            |                |           |    |    |    | 2207.029 | -1  | EGFGHLSPTGTTEFWLGNEK            |                          |
|    |            |                |           |    |    |    | 2545.256 | -4  | AIQVYYNPDQPPKPGMIEGATQK         |                          |
|    |            |                |           |    |    |    | 2561.256 | -1  | AIQVYYNPDQPPKPGM#IEGATQK        | 1 Oxidation (M)          |
|    |            |                |           |    |    |    | 2891.206 | 0   | LTYAYFIGGDAGDAFDGYDFGDDPS<br>DK |                          |
| 30 | <i>Gda</i> | gi 753304<br>2 | 3.07E-08  | 28 | 12 | 5  | 998.487  | 1   | FLYLGDDR                        |                          |
|    |            |                |           |    |    |    | 1058.623 | -5  | TPQLALIFR                       |                          |
|    |            |                |           |    |    |    | 1107.556 | -4  | NIEEVYVGGK                      |                          |
|    |            |                |           |    |    |    | 1371.752 | 1   | LATLGGSQALGLDR                  |                          |
|    |            |                |           |    |    |    | 1436.717 | -1  | IVFLEESSQKEK                    |                          |
|    |            |                |           |    |    |    | 1544.717 | 1   | FQSTDVAEEVYTR                   |                          |
|    |            |                |           |    |    |    | 1700.820 | 2   | RFQSTDVAEEVYTR                  |                          |
|    |            |                |           |    |    |    | 1814.885 | 1   | NYTDVYDKNNLLTNK                 |                          |
|    |            |                |           |    |    |    | 2087.043 | 3   | FLYLGDDRNIEEVYVGGK              |                          |
|    |            |                |           |    |    |    | 2147.107 | 1   | EIGNFEVGKDFDALLINPR             |                          |
|    |            |                |           |    |    |    | 2511.248 | 4   | THDLYIQSHISENREEIEAVK           |                          |
| 34 | <i>Hbb</i> | P02091         | 6.16E-07  | 84 | 14 | 14 | 912.466  | -5  | VHLTDAEK                        |                          |
|    |            |                |           |    |    |    | 1090.584 | 3   | VINAFNDGLK                      |                          |
|    |            |                |           |    |    |    | 1122.656 | 1   | VVAGVASALAHK                    |                          |
|    |            |                |           |    |    |    | 1126.558 | 2   | LHVPENFR                        |                          |
|    |            |                |           |    |    |    | 1218.676 | 0   | KVINAFNDGLK                     |                          |
|    |            |                |           |    |    |    | 1274.716 | -2  | LLVVYPWTQR                      |                          |
|    |            |                |           |    |    |    | 1298.625 | -1  | VNPDDVGGEALGR                   |                          |
|    |            |                |           |    |    |    | 1383.626 | -2  | EFSPC*AQAAFQK                   | Carbamidomethylation (C) |
|    |            |                |           |    |    |    | 1514.697 | -1  | GTF AHLSELHC*DK                 | Carbamidomethylation (C) |

|    |             |        |          |    |    |    |          |     |                          |                          |
|----|-------------|--------|----------|----|----|----|----------|-----|--------------------------|--------------------------|
|    |             |        |          |    |    |    | 1714.013 | 1   | LLGNMIVIVLGHHLGK         |                          |
|    |             |        |          |    |    |    | 1730.008 | 1   | LLGNM#IVIVLGHHLGK        | 1 Oxidation (M)          |
|    |             |        |          |    |    |    | 2006.906 | -1  | YFDSFGDLSSASAIMGNPK      |                          |
|    |             |        |          |    |    |    | 2022.904 | 1   | YFDSFGDLSSASAIM#GNPK     | 1 Oxidation (M)          |
|    |             |        |          |    |    |    | 2622.242 | 0   | GTF AHLSELHC*DKLHVDPENFR |                          |
| 37 | <i>Hpx</i>  | P20059 | 4.72E-10 | 26 | 14 | 8  | 734.383  | 10  | YPLDAR                   |                          |
|    |             |        |          |    |    |    | 746.398  | 1   | ELISER                   |                          |
|    |             |        |          |    |    |    | 793.396  | 5   | GEFVWR                   |                          |
|    |             |        |          |    |    |    | 795.428  | 0   | LYVTSGR                  |                          |
|    |             |        |          |    |    |    | 1079.454 | 0   | YYC*FQG NK               | Carbamidomethylation (C) |
|    |             |        |          |    |    |    | 1105.553 | -3  | GGNNLVSGYPK              |                          |
|    |             |        |          |    |    |    | 1114.485 | -5  | DYFISC*PGR               | Carbamidomethylation (C) |
|    |             |        |          |    |    |    | 1128.504 | -13 | WFWDFATR                 |                          |
|    |             |        |          |    |    |    | 1145.608 | -17 | VWVYPPEKK                |                          |
|    |             |        |          |    |    |    | 1212.625 | -3  | FN PVTGEVPPR             |                          |
|    |             |        |          |    |    |    | 1347.693 | -11 | GPDSVFLIKEDK             |                          |
|    |             |        |          |    |    |    | 1502.665 | -5  | GATYAFSGSHYWR            |                          |
|    |             |        |          |    |    |    | 1517.767 | -16 | EDKVWVYPPEKK             |                          |
|    |             |        |          |    |    |    | 1727.768 | -2  | GEC*QSEGV LFFQGNR        | Carbamidomethylation (C) |
| 41 | <i>Lmna</i> | P48679 | 1.43E-05 | 17 | 11 | 8  | 919.425  | -5  | SSFSQHAR                 |                          |
|    |             |        |          |    |    |    | 974.468  | -3  | LLEGEER                  |                          |
|    |             |        |          |    |    |    | 1023.499 | -4  | NIYSEELR                 |                          |
|    |             |        |          |    |    |    | 1089.546 | 0   | SLETENAGLR               |                          |
|    |             |        |          |    |    |    | 1165.539 | -2  | AA YEAE LGDAR            |                          |
|    |             |        |          |    |    |    | 1187.629 | -1  | LRDLED SLAR              |                          |
|    |             |        |          |    |    |    | 1293.631 | -3  | AA YEAE LGDARK           |                          |
|    |             |        |          |    |    |    | 1502.713 | -1  | AQHEDQVEQYKK             |                          |
|    |             |        |          |    |    |    | 1605.799 | -1  | LLAEKEREMAEMR            |                          |
|    |             |        |          |    |    |    | 1629.797 | -2  | LQEKEDLQELNDR            |                          |
|    |             |        |          |    |    |    | 1752.853 | -1  | NSNLVGA AHEELQ QSR       |                          |
| 49 | <i>Pzp</i>  | Q63041 | 1.05E-04 | 12 | 13 | 18 | 858.422  | -7  | YGAATFTK                 |                          |
|    |             |        |          |    |    |    | 870.526  | -8  | LLLQEV R                 |                          |
|    |             |        |          |    |    |    | 1101.55  | -2  | LQDQSNIQR                |                          |
|    |             |        |          |    |    |    | 1160.620 | -3  | VNTLPLNFDK               |                          |
|    |             |        |          |    |    |    | 1204.647 | -2  | LADLPGNYITK              |                          |
|    |             |        |          |    |    |    | 1229.649 | -2  | KLQDQSNIQR               |                          |
|    |             |        |          |    |    |    | 1404.777 | -5  | M#VSGFIPVKPSVK           | 1 Oxidation (M)          |

|    |                 |                 |          |    |    |    |          |     |                                         |                          |
|----|-----------------|-----------------|----------|----|----|----|----------|-----|-----------------------------------------|--------------------------|
|    |                 |                 |          |    |    |    | 1672.878 | -2  | TEVNTNHVLIYIEK                          |                          |
|    |                 |                 |          |    |    |    | 1791.903 | -3  | YNILPEAEGEAPFTLK                        |                          |
|    |                 |                 |          |    |    |    | 2357.155 | -2  | EVSVTIESSGTVSGTLHVNNGNR                 |                          |
|    |                 |                 |          |    |    |    | 2403.174 | -3  | QQNSHGGFSSTQDTVVALQALSK                 |                          |
|    |                 |                 |          |    |    |    | 2807.307 | -17 | YFPETWIWDMVPLDLSGDGELPVK                |                          |
|    |                 |                 |          |    |    |    | 3226.294 | -4  | VYDYYETDEFAIEEYSAPFSSDSEQGN<br>NA       |                          |
| 50 | <i>Serpinal</i> | P17475          | 6.63E-06 | 29 | 11 | 26 | 763.344  | -9  | VPMMNR                                  | 1 Oxidation (M)          |
|    |                 |                 |          |    |    |    | 916.507  | 5   | AVLTLDER                                |                          |
|    |                 |                 |          |    |    |    | 938.530  | 3   | SAILYFPK                                |                          |
|    |                 |                 |          |    |    |    | 946.421  | 2   | DADFHVDK                                |                          |
|    |                 |                 |          |    |    |    | 979.505  | 3   | VINDYVEK                                |                          |
|    |                 |                 |          |    |    |    | 1153.589 | 10  | RPFNPEHTR                               |                          |
|    |                 |                 |          |    |    |    | 1228.633 | 5   | MQHLEQTLTK                              |                          |
|    |                 |                 |          |    |    |    | 1244.628 | 5   | M#QHLEQTLTK                             | 1 Oxidation (M)          |
|    |                 |                 |          |    |    |    | 1918.941 | 5   | VFNNADLSGITEDAPLK                       |                          |
|    |                 |                 |          |    |    |    | 2168.129 | 5   | GTEAAGATVVEAVPM#SLPPQVK                 | 1 Oxidation (M)          |
|    |                 |                 |          |    |    |    | 2287.028 | 4   | NNYHSEAFSVNFADSEEAKK                    |                          |
| 52 | <i>Serpinfl</i> | Q80ZA3          | 2.77E-06 | 37 | 11 | 24 | 836.415  | -18 | SYGTRPR                                 |                          |
|    |                 |                 |          |    |    |    | 977.513  | -9  | SSFVAPLEK                               |                          |
|    |                 |                 |          |    |    |    | 1397.678 | -6  | LQSLFESPDFSK                            |                          |
|    |                 |                 |          |    |    |    | 1489.677 | -5  | TTLQDFHLDEDR                            |                          |
|    |                 |                 |          |    |    |    | 1559.770 | -4  | LAAAVSNFGYDLR                           |                          |
|    |                 |                 |          |    |    |    | 1617.774 | -3  | KTTLQDFHLDEDR                           |                          |
|    |                 |                 |          |    |    |    | 1940.920 | -18 | LKLSYEGDVTNSLQDMK                       |                          |
|    |                 |                 |          |    |    |    | 2040.993 | -3  | ALYYDLINNPDIHSTYK                       |                          |
|    |                 |                 |          |    |    |    | 2375.075 | -3  | AAFEWNEEGAGTSSNPDLQPVR                  |                          |
|    |                 |                 |          |    |    |    | 2883.564 | 10  | STREM#PSALSILLLGVAIFYFKGWAT<br>K        | 1 Oxidation (M)          |
|    |                 |                 |          |    |    |    | 2883.564 | -2  | SGAVSTGNILLSPLSVATALSALS<br>SLG<br>AEQR |                          |
| 53 | <i>sid23p</i>   | gi 277034<br>60 | 2.31E-04 | 26 | 6  | 17 | 816.387  | -1  | IFYDMK                                  |                          |
|    |                 |                 |          |    |    |    | 832.380  | -4  | IFYDM#K                                 | 1 Oxidation (M)          |
|    |                 |                 |          |    |    |    | 1251.671 | 2   | AVIFC*LSADKK                            | Carbamidomethylation (C) |
|    |                 |                 |          |    |    |    | 1251.671 | 2   | KAVIFC*LSADK                            | Carbamidomethylation (C) |
|    |                 |                 |          |    |    |    | 1307.610 | 1   | YALYDASFETK                             |                          |
|    |                 |                 |          |    |    |    | 1504.703 | 5   | HFVGMLEPKDC*R                           | Carbamidomethylation (C) |

|    |           |        |          |    |    |    |          |    |                  | lation (C)               |
|----|-----------|--------|----------|----|----|----|----------|----|------------------|--------------------------|
| 56 | <i>Tf</i> | P12346 | 1.72E-09 | 22 | 15 | 12 | 915.466  | 5  | VAQEHFGK         |                          |
|    |           |        |          |    |    |    | 949.557  | 7  | IPSHAVVAR        |                          |
|    |           |        |          |    |    |    | 1186.549 | 13 | WC*ALSHQER       | Carbamidomethylation (C) |
|    |           |        |          |    |    |    | 1348.675 | -1 | GTDFQLNQLQGK     |                          |
|    |           |        |          |    |    |    | 1348.675 | 25 | ASDSSINWNNLK     |                          |
|    |           |        |          |    |    |    | 1359.605 | 13 | WC*AVSEHENTK     | Carbamidomethylation (C) |
|    |           |        |          |    |    |    | 1392.762 | 4  | LYLGHSYVTAIR     |                          |
|    |           |        |          |    |    |    | 1423.757 | 5  | SKDFQLFGSPLGK    |                          |
|    |           |        |          |    |    |    | 1476.784 | 8  | KGTFQLNQLQGK     |                          |
|    |           |        |          |    |    |    | 1476.784 | 8  | GTDFQLNQLQGKK    |                          |
|    |           |        |          |    |    |    | 1558.748 | 9  | EGVC*PEASIDSAPVK | Carbamidomethylation (C) |
|    |           |        |          |    |    |    | 1589.700 | 16 | GDKDC*TGNFC*LFR  | Carbamidomethylation (C) |
|    |           |        |          |    |    |    | 1652.724 | 16 | FDEFFSQGC*APGYK  | Carbamidomethylation (C) |
|    |           |        |          |    |    |    | 1656.780 | 12 | KPVDQYEDC*YLAR   |                          |
|    |           |        |          |    |    |    | 1881.887 | 10 | ADRDQYELLC*LDNTR | Carbamidomethylation (C) |
