# Supplementary material
Source: PubMed Central journal article supplement (PMC2849705)
Supplement: supp_M900286-MCP200_Supplemental_Table_3.pdf [file supp_M900286-MCP200_Supplemental_Table_3.pdf]

**Supplemental Table 3.** Database Search Results of spectra acquired on the LC-LTQ Mass Spectrometry. The tandem mass spectra were annotated and generated peak list files (.DTA), by running SEQUEST extract\_msn algorithm in Bioworks version 3.2 (Thermo Electron, Bremen, Germany). The resulting peptide mass lists were then used to interrogated sequences present in an indexed rat subset database (36,274 sequences), that was created from NCBI nr 3,893,302 sequences (release 07/04/06) and stored locally, by running SEQUEST SEARCH algorithm of Bioworks software version 3.2. SEQUEST searching were performed with maximum peptide and fragment ion mass tolerance of 2.5 and 1.0 Da respectively, and with partial methionine oxidation (M) and complete carbamidomethylation of cysteine (C), and 2 missed cleavage sites were also allowed in the search parameter. For each protein identification, a minimum of two peptides with a significant peptide expectation ( $P < 0.001$ ), peptide Xcorr 1.9, 2.7, and 3.5 for the charge states and +1, +2, and +3 respectively, minimum Delta CN (Delta correlation) of 0.1.

| Pos.     | Gene name   | Accession number | P (Pro.)<br>P (pep.) | % seq.<br>cove. | Score<br>Xc, z  | $\Delta$ Cn | LC-MS/MS              |            |                      | Modification             |      |           |          |                         |
|----------|-------------|------------------|----------------------|-----------------|-----------------|-------------|-----------------------|------------|----------------------|--------------------------|------|-----------|----------|-------------------------|
|          |             |                  |                      |                 |                 |             | Measured mass (M + H) | $\Delta$ M | Peptide Sequence     |                          |      |           |          |                         |
| 1        | <i>A2U</i>  | gi 777480<br>75  | 3.91E-06             | 11.05           | 20.18           | 0.37        | 1263.6790             | 0.00379    | R.TKDLSSDIKEK.F      | Carbamidomethylation (C) |      |           |          |                         |
|          |             |                  | 2.17E-04             |                 | 3.5, 3          |             |                       |            |                      |                          |      |           |          |                         |
|          |             |                  | 3.91E-06             |                 | 3.91, 2         |             |                       |            |                      |                          | 0.54 | 1056.5560 | -0.02705 | K.LC*EAHGITR.D          |
| 2        | <i>Alb</i>  | P002770          | 1.48E-07             | 12.99           | 70.26           | 0.60        | 1746.7920             | -0.03914   | K.YNEVLTQC*C*TESDK.A | Carbamidomethylation (C) |      |           |          |                         |
|          |             |                  | 1.48E-07             |                 | 4.28, 2         |             |                       |            |                      |                          |      |           |          |                         |
|          |             |                  | 5.29E-05             |                 | 2.67, 2         |             |                       |            |                      |                          | 0.64 | 1415.6176 | -0.04584 | R.DNYGELADC*C*AK.Q      |
|          |             |                  | 1.19E-04             |                 | 5.21, 3         |             |                       |            |                      |                          | 0.49 | 1948.9486 | -0.00670 | K.AADKDNC*FATEGPNLVAR.S |
|          |             |                  | 6.61E-06             |                 | 3.11, 2         |             |                       |            |                      |                          | 0.56 | 1439.7853 | 0.00908  | K.APQVSTPTLVEAAR.N      |
|          |             |                  | 7.63E-05             |                 | 3.10, 3         |             |                       |            |                      |                          | 0.33 | 1439.7853 | 0.01200  | K.APQVSTPTLVEAAR.N      |
|          |             |                  | 4.52E-04             |                 | 3.07, 2         |             |                       |            |                      |                          | 0.43 | 1149.6149 | 0.00798  | K.LVQEVTDFAK.T          |
|          |             |                  | 2.18E-07             |                 | 3.26, 2         |             |                       |            |                      |                          | 0.44 | 1266.6365 | 0.01250  | R.FPNAEFAEITK.L         |
| 3        | <i>Crp1</i> | P22282           | 3.95E-09             | 27.27           | 60.17           | 0.38        | 1015.5095             | 0.00359    | R.KIDSDFYK.C         | Carbamidomethylation (C) |      |           |          |                         |
|          |             |                  | 5.29E-04             |                 | 2.92, 2         |             |                       |            |                      |                          |      |           |          |                         |
|          |             |                  | 3.95E-09             |                 | 3.25, 2         |             |                       |            |                      |                          | 0.47 | 1906.9269 | -0.02254 | K.LDNC*PFEEQTEQLKR.E    |
|          |             |                  | 2.09E-08             |                 | 3.02, 2         |             |                       |            |                      |                          | 0.30 | 1750.8258 | -0.02226 | K.LDNC*PFEEQTEQLK.R     |
| 6.58E-05 | 3.47, 2     | 0.41             | 1126.6143            | 0.00139         | K.LKD VYD VFK.Y |             |                       |            |                      |                          |      |           |          |                         |

|    |                |        |          |       |         |      |            |         |                           |               |
|----|----------------|--------|----------|-------|---------|------|------------|---------|---------------------------|---------------|
|    |                |        | 4.92E-04 |       | 1.96, 1 | 0.20 | 885.43524  | 0.00360 | K.DVYDVFK.Y               |               |
|    |                |        | 1.03E08  |       | 3.34, 2 | 0.60 | 1786.8680  | 0.00278 | R.TPGETM#YYISLPGSVR.C     | Oxidation (M) |
| 4  | <i>Apcs</i>    | P23680 | 2.63E-08 | 14.04 | 20.21   |      |            |         |                           |               |
|    |                |        | 2.63E-08 |       | 4.01, 2 | 0.57 | 1374.6648  | 0.00603 | R.SQSLFSYSVNSR.D          |               |
|    |                |        | 3.00E-08 |       | 2.99, 2 | 0.53 | 2084.9771  | 0.00469 | K.SSPSIVLGQEQDTYGGGFDK.T  |               |
| 5  | <i>Apeh</i>    | P13676 | 1.23E-10 | 8.09  | 70.22   |      |            |         |                           |               |
|    |                |        | 3.75E-09 |       | 2.83, 2 | 0.48 | 1634.7601  | 0.00167 | K.ALDISASDDEM#ARPK.K      | Oxidation (M) |
|    |                |        | 3.90E-08 |       | 3.63, 2 | 0.52 | 1618.7717  | 0.00591 | K.ALDISASDDEMARPK.K       |               |
|    |                |        | 2.50E-05 |       | 2.27, 2 | 0.22 | 911.5349   | 0.00096 | K.VGFLPPP GK.E            |               |
|    |                |        | 7.37E-04 |       | 3.69, 2 | 0.37 | 1183.7045  | 0.00224 | K.VTSVVVDIVPR.Q           |               |
|    |                |        | 8.52E-09 |       | 3.73, 2 | 0.64 | 1272.6471  | 0.00359 | R.SALYYVDLSGGK.C          |               |
|    |                |        | 2.25E-09 |       | 4.42, 2 | 0.56 | 1387.7249  | 0.00226 | K.TPVLLM#LGQEDR.R         | Oxidation (M) |
|    |                |        | 1.23E-10 |       | 4.15, 2 | 0.63 | 1371.7301  | 0.00408 | K.TPVLLMLGQEDR.R          |               |
| 6  | <i>apoA-I</i>  | P04639 | 4.42E-10 | 29.34 | 100.25  |      |            |         |                           |               |
|    |                |        | 1.45E-05 |       | 3.26, 2 | 0.27 | 1349.63654 | 0.00596 | R.NEM#NKDLENVK.Q          | Oxidation (M) |
|    |                |        | 1.64E-04 |       | 2.54, 2 | 0.32 | 1069.49038 | 0.00454 | K.IM#SM#IDEAK.K           | Oxidation (M) |
|    |                |        | 2.43E-06 |       | 3.37, 2 | 0.19 | 1333.64160 | 0.00566 | R.NEMNKDLENVK.Q           |               |
|    |                |        | 8.04E-04 |       | 3.08, 2 | 0.31 | 1053.49548 | 0.00310 | K.IMSM#IDEAK.K            | Oxidation (M) |
|    |                |        | 1.90E-06 |       | 3.21, 2 | 0.41 | 1417.64163 | 0.00442 | K.M#QPHLDEFQEK.W          | Oxidation (M) |
|    |                |        | 9.01E-05 |       | 2.96, 2 | 0.46 | 1132.50916 | 0.00456 | K.FGLYSDQM#R.E            | Oxidation (M) |
|    |                |        | 5.53E-06 |       | 2.93, 2 | 0.28 | 1116.51428 | 0.00444 | K.FGLYSDQMR.E             |               |
|    |                |        | 2.11E-04 |       | 3.62, 3 | 0.25 | 1454.78894 | 0.00403 | R.VKDFATVYVDAVK.D         |               |
|    |                |        | 4.42E-10 |       | 4.34, 2 | 0.45 | 1454.78894 | 0.00347 | R.VKDFATVYVDAVK.D         |               |
|    |                |        | 9.26E-08 |       | 3.43, 2 | 0.57 | 1460.69031 | 0.0044  | R.DYVSQFESSTLGK.Q         |               |
| 7  | <i>apoA-IV</i> | P02651 | 7.61E-10 | 36.32 | 130.23  |      |            |         |                           |               |
|    |                |        | 2.86E-06 |       | 2.76, 2 | 0.25 | 1087.61060 | 0.00640 | K.LKGNTEGLQK.S            |               |
|    |                |        | 5.19E-04 |       | 2.05, 2 | 0.11 | 944.50476  | 0.00463 | K.EAVEQLQK.T              |               |
|    |                |        | 9.89E-04 |       | 2.44, 2 | 0.26 | 1096.50916 | 0.00554 | K.FNQNM#EGLK.G            | Oxidation (M) |
|    |                |        | 2.69E-06 |       | 3.09, 2 | 0.45 | 1268.59395 | 0.00473 | K.VSQM#FGDNVQK.L          | Oxidation (M) |
|    |                |        | 7.15E-05 |       | 4.26, 3 | 0.38 | 1578.74028 | 0.00438 | K.LNHQM#EGLAFQM#K.K       | Oxidation (M) |
|    |                |        | 1.44E-05 |       | 3.95, 2 | 0.37 | 1370.64425 | 0.00460 | K.FNM#ALVQQM#EK.F         | Oxidation (M) |
|    |                |        | 6.83E-08 |       | 2.58, 2 | 0.47 | 1261.65356 | 0.00603 | K.QLDQQVEVFR.R            |               |
|    |                |        | 9.72E-10 |       | 4.54, 2 | 0.64 | 1578.77588 | 0.00713 | K.LGNINTYADDLQNK.L        |               |
|    |                |        | 1.09E-06 |       | 3.19, 2 | 0.54 | 1312.71069 | 0.00554 | K.NLAPLVEDVQSK.L          |               |
|    |                |        | 1.03E-06 |       | 3.94, 3 | 0.59 | 2180.07257 | 0.00766 | R.AVEPLGDKFNM#ALVQQM#EK.F | Oxidation (M) |
|    |                |        | 3.06E-05 |       | 2.97, 2 | 0.41 | 1287.65393 | 0.00102 | K.ATIDQNLEDLR.S           |               |
|    |                |        | 2.06E-07 |       | 3.18, 2 | 0.50 | 1154.64160 | 0.00578 | R.LAPLAEGVQEK.L           |               |
|    |                |        | 7.16E-10 |       | 4.62, 2 | 0.57 | 1650.83337 | 0.00493 | K.TDVTQQLNTLFQDK.L        |               |
| 10 | C3             | P01026 | 5.23E-08 | 3.43  | 40.21   |      |            |         |                           |               |

|    |       |             |          |       |         |      |            |          |                          |                          |
|----|-------|-------------|----------|-------|---------|------|------------|----------|--------------------------|--------------------------|
|    |       |             | 2.19E-04 |       | 2.80, 2 | 0.51 | 1055.55200 | 0.02068  | K.GYTQQLAFK.Q            |                          |
|    |       |             | 1.92E-05 |       | 3.52, 2 | 0.42 | 1014.58301 | 0.01512  | K.IGLQEVEVK.A            |                          |
|    |       |             | 5.23E-08 |       | 2.87, 2 | 0.36 | 1730.86831 | -0.01463 | R.DIC*EGQVNSLPGSINK.A    | Carbamidomethylation (C) |
|    |       |             | 8.55E-08 |       | 3.57, 2 | 0.67 | 1683.76245 | 0.00933  | K.VYSYYNLEESC*TR.F       | Carbamidomethylation (C) |
| 11 | C5    | gi 2494211  | 9.24E-10 | 5.50  | 70.23   |      |            |          |                          |                          |
|    |       |             | 2.35E-8  |       | 2.79, 2 | 0.43 | 1528.7125  | 0.01506  | K.TDAPELPEENQASK.E       |                          |
|    |       |             | 1.38E-05 |       | 2.84, 2 | 0.43 | 1335.7154  | 0.01848  | R.VYSLSDDLKPAK.R         |                          |
|    |       |             | 1.14E-04 |       | 3.44, 3 | 0.43 | 1956.9173  | 0.00654  | R.VFQAFDDKSDLGC*GAGGGR.D |                          |
|    |       |             | 9.24E-10 |       | 3.74, 2 | 0.51 | 1657.8067  | 0.02617  | K.VTYSSGYVNLSPENK.F      |                          |
|    |       |             | 1.44E-04 |       | 3.10, 2 | 0.47 | 1328.7572  | 0.02666  | K.FQNSALLTLPPK.Q         |                          |
|    |       |             | 6.05E-08 |       | 3.21, 2 | 0.36 | 1553.7329  | 0.03789  | K.ELSYESLEDLNNK.Y        |                          |
| 12 | Ca2   | P27139      | 7.07E-11 | 17.69 | 50.18   |      |            |          |                          |                          |
|    |       |             | 8.88E-07 |       | 3.09, 2 | 0.48 | 998.56293  | 0.00237  | K.IGPASQGLQK.I           |                          |
|    |       |             | 4.97E-06 |       | 2.61, 3 | 0.51 | 1663.7744  | 0.00404  | K.EPITVSSEQM#SHFR.K      | Oxidation (M)            |
|    |       |             | 1.82E-07 |       | 2.35, 2 | 0.52 | 1663.7744  | 0.00003  | K.EPITVSSEQM#SHFR.K      | Oxidation (M)            |
|    |       |             | 7.07E-11 |       | 3.18, 2 | 0.65 | 1647.7795  | 0.00127  | K.EPITVSSEQMSHFR.K       |                          |
|    |       |             | 2.84E-09 |       | 2.92, 3 | 0.42 | 1647.7795  | 0.00174  | K.EPITVSSEQMSHFR.K       |                          |
|    |       |             | 6.18E-08 |       | 2.72, 3 | 0.48 | 1581.8172  | 0.00193  | K.YAAELHLVHWNTK.Y        |                          |
|    |       |             | 5.88E-09 |       | 3.17, 2 | 0.40 | 1581.8172  | -0.00044 | K.YAAELHLVHWNTK.Y        |                          |
|    |       |             | 1.30E-05 |       | 2.99, 2 | 0.38 | 1011.5833  | 0.00224  | K.ITEALHSIK.T            |                          |
| 14 | CcI-8 | gi 33086660 | 4.97E-06 | 4.50  | 40.17   |      |            |          |                          |                          |
|    |       |             | 7.81E-05 |       | 2.75, 2 | 0.49 | 1544.7566  | -0.01062 | R.EGVC*PEGSIDSAPVK.W     | Carbamidomethylation (C) |
|    |       |             | 4.97E-06 |       | 2.82, 2 | 0.50 | 969.5404   | 0.00939  | K.GYYAVAVVK.A            |                          |
|    |       |             | 9.48E-04 |       | 3.45, 2 | 0.36 | 1348.6855  | 0.01677  | K.GTDFQLNQLQK.K          |                          |
|    |       |             |          |       | 2.78, 2 | 0.22 | 878.4730   | 0.00878  | K.DSAFGLLR.V             |                          |
| 15 | Cct4  | Q7TPB1      | 6.04E-11 | 18.74 | 90.23   |      |            |          |                          |                          |
|    |       |             | 1.89E-05 |       | 3.05, 2 | 0.41 | 1302.6122  | -0.00585 | R.TLSGMESYC*VR.A         | Carbamidomethylation (C) |
|    |       |             | 5.07E-04 |       | 3.69, 2 | 0.38 | 1145.6652  | -0.01285 | K.TGC*NVLLIQK.S          | Carbamidomethylation (C) |
|    |       |             | 6.04E-11 |       | 3.96, 2 | 0.66 | 2032.8586  | 0.07148  | K.TDM#DNQIVVSDYAQM#DR.V  | Oxidation (M)            |
|    |       |             | 3.75E-09 |       | 4.47, 2 | 0.64 | 1478.7696  | 0.03679  | R.ETLLNSATSLNSK.V        |                          |
|    |       |             | 1.60E-06 |       | 3.56, 2 | 0.30 | 1417.7533  | 0.02007  | K.GDVITITNDGATILK.Q      |                          |
|    |       |             | 1.06E-10 |       | 4.68, 2 | 0.66 | 1357.7321  | 0.01677  | K.VIDPATATSVDLR.D        |                          |
|    |       |             | 9.34E-06 |       | 3.69, 2 | 0.56 | 1150.5772  | 0.01729  | K.GLEILTDM#SR.P          | Oxidation (M)            |

|    |                |              |          |       |         |      |           |          |                            |                          |
|----|----------------|--------------|----------|-------|---------|------|-----------|----------|----------------------------|--------------------------|
|    |                |              | 1.4E-05  |       | 2.76, 2 | 0.33 | 1566.7773 | -0.00279 | K.DIEREDIEFIC*K.T          | Carbamidomethylation (C) |
|    |                |              | 1.54E-06 |       | 3.54, 2 | 0.48 | 1134.5822 | 0.01763  | K.GLEILTDMSR.P             |                          |
| 16 | <i>Cct5</i>    | Q6B436       | 9.14E-12 | 23.66 | 100.29  |      |           |          |                            |                          |
|    |                |              | 1.45E-06 |       | 3.18, 2 | 0.44 | 1093.5272 | 0.00554  | R.IADGYEQAAR.I             |                          |
|    |                |              | 1.01E-04 |       | 2.28, 2 | 0.23 | 1001.5262 | 0.00658  | R.TSLGPNGLDK.M             |                          |
|    |                |              | 4.02E-04 |       | 2.47, 2 | 0.35 | 1453.7409 | -0.02774 | K.ESNPALGIDC*LHK.G         | Carbamidomethylation (C) |
|    |                |              | 8.25E-05 |       | 3.08, 2 | 0.42 | 1381.7031 | 0.01331  | K.EKFEEM#IAQIK.E           | Oxidation (M)            |
|    |                |              | 3.27E-05 |       | 2.53, 2 | 0.27 | 1274.6884 | 0.00627  | K.QQISLATQMVR.M            |                          |
|    |                |              | 2.00E-06 |       | 3.45, 2 | 0.51 | 1168.5732 | 0.00603  | K.LDVTSVEDYK.A             |                          |
|    |                |              | 4.96E-04 |       | 3.43, 2 | 0.51 | 1610.9280 | 0.97207  | K.IAILTC*PFEPKPK.T         | Carbamidomethylation (C) |
|    |                |              | 3.03E-06 |       | 3.69, 2 | 0.43 | 1391.7417 | 0.00469  | R.DVDFELIKVEGK.V           |                          |
|    |                |              | 9.14E-12 |       | 5.02, 3 | 0.54 | 2193.1760 | 1.02860  | K.ISDNVLVDINNPEPLIQTAK.T   |                          |
|    |                |              | 3.45E-10 |       | 5.45, 2 | 0.62 | 2193.1760 | 0.02446  | K.ISDNVLVDINNPEPLIQTAK.T   |                          |
|    |                |              | 1.16E-05 |       | 3.93, 2 | 0.58 | 1738.9486 | 0.01909  | R.WVGGPEIELIAIATGGR.I      |                          |
| 17 | <i>Col14a1</i> | gi 109480777 | 5.23E-09 | 4.62  | 80.2    |      |           |          |                            |                          |
|    |                |              | 1.42E-05 |       | 3.02, 2 | 0.45 | 1082.4901 | 0.00542  | R.VSEEWYNR.L               |                          |
|    |                |              | 1.27E-07 |       | 3.38, 2 | 0.49 | 1176.6007 | 0.00517  | R.IGLAQYSGDPR.I            |                          |
|    |                |              | 1.37E-07 |       | 2.76, 2 | 0.15 | 971.5883  | 0.00463  | K.VIVVITDGR.S              |                          |
|    |                |              | 1.10E-04 |       | 3.52, 2 | 0.54 | 1262.5465 | 0.00836  | K.M#M#EM#FGLVEK.D          | Oxidation (M)            |
|    |                |              | 1.69E-06 |       | 3.39, 2 | 0.49 | 1183.5589 | 0.00664  | R.DTLFTADSGTR.R            |                          |
|    |                |              | 5.23E-09 |       | 3.98, 2 | 0.47 | 1402.7172 | 0.01164  | R.NLVVDDEAATSLR.V          |                          |
|    |                |              | 3.19E-05 |       | 2.97, 2 | 0.45 | 921.4676  | 0.00475  | K.DGVDIAGFK.M              |                          |
|    |                |              | 5.32E-06 |       | 3.53, 2 | 0.44 | 1232.6884 | 0.00786  | R.EAGVELFAIGVK.N           |                          |
| 18 | <i>Colla1</i>  | P02454       | 7.77E-15 |       | 30.26   |      |           |          |                            |                          |
|    |                |              | 1.64E-08 |       | 5.28, 3 | 0.55 | 1974.9740 | 0.00943  | K.NGDRGETGPAGPAGPIGPAGAR.G |                          |
|    |                |              | 1.07E-04 |       | 2.64, 2 | 0.31 | 1468.7212 | 0.01522  | K.SAGVSVPGPM#GPSGPR.G      | Oxidation (M)            |
|    |                |              | 7.77E-15 |       | 4.69, 2 | 0.57 | 1532.7816 | 0.00444  | R.GETGPAGPAGPIGPAGAR.G     |                          |
|    |                |              | 8.50E-10 |       | 4.50, 2 | 0.66 | 1800.8697 | 0.03681  | R.GPPGPM#GPPGLAGPPGESGR.E  | Oxidation (M)            |
| 19 | <i>Colla2</i>  | P02466       | 9.06E-07 |       | 44.16   |      |           |          |                            |                          |
|    |                |              | 4.23E-04 |       | 2.78, 2 | 0.42 | 1053.5098 | 0.01531  | K.DYEV DATLK.S             |                          |
|    |                |              | 9.97E-06 |       | 2.76, 2 | 0.53 | 1213.5703 | 0.01183  | K.EM#ATQLAFMR.L            | Oxidation (M)            |
|    |                |              | 9.06E-07 |       | 3.10, 2 | 0.57 | 1383.6871 | 0.02287  | K.GVSAGPGPMGLMGPR.G        |                          |
|    |                |              | 4.72E-06 |       | 2.78, 2 | 0.43 | 1197.5754 | 0.02825  | K.EMATQLAFMR.L             |                          |
| 20 | <i>Col6a2</i>  | Q5EB88       | 1.22E-14 |       | 80.30   |      |           |          |                            |                          |
|    |                |              | 3.46E-08 |       | 3.80, 2 | 0.51 | 1328.6593 | 0.00774  | R.DIANTPHELYR.N            |                          |

|    |               |                  |          |         |       |           |          |                                     |                          |
|----|---------------|------------------|----------|---------|-------|-----------|----------|-------------------------------------|--------------------------|
|    |               |                  | 4.96E-12 | 5.96, 3 | 0.50  | 2370.0626 | 0.01553  | R.NNYATM#RPDSTEIDQDTINR.I           | Oxidation (M)            |
|    |               |                  | 1.62E-05 | 2.96, 2 | 0.30  | 998.4942  | 0.00408  | R.LGEQNFYK.A                        |                          |
|    |               |                  | 1.19E-07 | 2.89, 3 | 0.47  | 1509.7543 | 0.00794  | R.LDDERVNSLSSFK.E                   |                          |
|    |               |                  | 2.79E-05 | 2.80, 2 | 0.36  | 1509.7543 | 0.00969  | R.LDDERVNSLSSFK.E                   |                          |
|    |               |                  | 1.22E-14 | 5.72, 3 | 0.59  | 2354.0676 | 0.01609  | R.NNYATMRPDSTEIDQDTINR.             |                          |
|    |               |                  | 4.31E-10 | 4.19, 3 | 0.58  | 1791.9024 | 0.01120  | R.VGVVQYSHEGTFEAIR.L                |                          |
|    |               |                  | 1.42E-04 | 3.14, 2 | 0.29  | 1074.6054 | 0.00530  | K.NFVINVVNR.L                       |                          |
|    |               |                  | 3.87E-04 | 3.26, 2 | 0.37  | 1076.6098 | 0.00505  | R.VFAVVITDGR.H                      |                          |
| 21 | <i>Col6a3</i> | gi 157817<br>857 | 3.03E-09 | 80.22   |       |           |          |                                     |                          |
|    |               |                  | 7.01E-07 | 2.59, 2 | 0.45  | 1050.5578 | 0.01799  | R.VALVQYSDR.T                       |                          |
|    |               |                  | 8.62E-06 | 2.88, 2 | 0.40  | 1273.6383 | 0.02458  | R.TDLQTITNDPR.L                     |                          |
|    |               |                  | 3.03E-09 | 4.42, 2 | 0.53  | 1411.7540 | 0.03301  | R.VVESLDVGPVQVR.V                   |                          |
|    |               |                  | 1.12E-06 | 3.45, 2 | 0.39  | 1116.6007 | 0.02446  | K.SQNSVLEAIR.R                      |                          |
|    |               |                  | 6.53E-04 | 2.46, 2 | 0.15  | 979.5029  | 0.01665  | R.LMQVEFGR.G                        |                          |
|    |               |                  | 1.01E-04 | 3.98, 2 | 0.38  | 1531.7598 | 0.04131  | K.SLDDVSQAAQELQK.G                  |                          |
|    |               |                  | 2.04E-08 | 4.07, 2 | 0.46  | 1603.8173 | 0.02312  | K.SVEDAQDVSLALTQK.G                 |                          |
|    |               |                  | 6.06E-06 | 2.81, 2 | 0.45  | 1372.7430 | 0.02703  | R.ELGTIQVISER.V                     |                          |
| 22 | <i>Crmp4</i>  | gi 145182<br>93  | 9.57E-13 | 90.30   |       |           |          |                                     |                          |
|    |               |                  | 1.11E-09 | 4.43, 2 | 0.56  | 1710.8591 | 0.00920  | K.IMLEDGNLHVVTQGAGR.F               |                          |
|    |               |                  | 5.58E-05 | 3.46, 3 | 0.44  | 2030.9890 | 0.00565  | R.NLHQSGFSLSGTQVDEGVR.S             |                          |
|    |               |                  | 9.57E-13 | 6.05, 2 | 0.69  | 2030.9890 | 1.01396  | R.NLHQSGFSLSGTQVDEGVR.S             |                          |
|    |               |                  | 8.38E-08 | 4.49, 2 | 0.51  | 1765.9458 | -0.02184 | R.AITVASQTNC*PLYVTK.V               | Carbamidomethylation (C) |
|    |               |                  | 1.82E-06 | 3.33, 2 | 0.46  | 1748.8085 | 0.01128  | K.DNFTAIPGTNGVEER.M                 |                          |
|    |               |                  | 1.42E-05 | 2.46, 2 | 0.38  | 1309.7474 | 0.00749  | K.QIGDNLIVPGGVK.T                   |                          |
|    |               |                  | 1.51E-05 | 3.30, 2 | 0.51  | 1462.6548 | 0.00676  | K.GM#TTVDDFFQGTK.A                  | Oxidation (M)            |
|    |               |                  | 3.47E-06 | 3.23, 2 | 0.49  | 1446.6569 | 0.00725  | K.GMTTVDDFFQGTK.A                   |                          |
|    |               |                  | 2.02E-10 | 4.35, 2 | 0.67  | 1614.7828 | 0.01116  | R.GMYDGPVFDLTTTPK.G                 |                          |
|    |               |                  | 3.31E-12 | 6.10, 3 | 0.55  | 2929.4499 | 0.01542  | K.AALAGGTTMIIDHVPEPESSLTEA<br>YEK.W |                          |
| 23 | <i>Ethel</i>  | B0BNJ4           | 1.38E-06 | 12.99   | 30.18 |           |          |                                     |                          |
|    |               |                  | 1.53E-06 | 3.29, 2 | 0.49  | 1316.7296 | -0.02756 | R.SLLPGC*QSVISRL                    | Carbamidomethylation (C) |
|    |               |                  | 2.37E-04 | 2.66, 2 | 0.54  | 1348.6507 | -0.02823 | K.SC*TYTYLLGDR.D                    | Carbamidomethylation (C) |
|    |               |                  | 1.38E-06 | 2.85, 2 | 0.49  | 1239.6594 | -0.02943 | R.LTLSC*EEFIK.V                     | Carbamidomethylation (C) |
| 26 | <i>Fgb</i>    | P14480           | 1.39E-11 | 138.26  |       |           |          |                                     |                          |

|    |              |              |          |         |        |           |          |                             |                          |
|----|--------------|--------------|----------|---------|--------|-----------|----------|-----------------------------|--------------------------|
|    |              |              | 9.60E-05 | 3.23, 3 | 0.32   | 1522.7285 | 0.00336  | K.AHYGGFTVQTEANK.Y          |                          |
|    |              |              | 2.95E-10 | 3.39, 2 | 0.51   | 1522.7285 | 0.00493  | K.AHYGGFTVQTEANK.Y          |                          |
|    |              |              | 1.84E-04 | 4.15, 3 | 0.34   | 1986.9324 | 0.00484  | R.KGGETSEM#YLIQPDTSSK.P     | Oxidation (M)            |
|    |              |              | 9.96E-04 | 3.48, 3 | 0.45   | 2403.1496 | 0.00578  | R.KGGETSEM#YLIQPDTSSKP.YR.V | Oxidation (M)            |
|    |              |              | 1.78E-11 | 4.41, 3 | 0.49   | 2387.1547 | 0.00565  | R.KGGETSEMYLIQPDTSSKP.YR.V  |                          |
|    |              |              | 3.73E-09 | 2.92, 3 | 0.57   | 1977.0188 | 0.00223  | K.EEPPSLRPAPPPISGGGYR.A     |                          |
|    |              |              | 1.04E-04 | 2.85, 2 | 0.34   | 1275.5600 | 0.00298  | R.DNDGWVTTDPR.K             |                          |
|    |              |              | 2.44E-04 | 3.68, 3 | 0.44   | 1970.9375 | 0.00278  | R.KGGETSEMYLIQPDTSSK.P      |                          |
|    |              |              | 1.18E-05 | 4.45, 2 | 0.42   | 1374.6760 | 0.00188  | K.TENGGWTVIQNR.Q            |                          |
|    |              |              | 1.17E-05 | 3.99, 3 | 0.62   | 2259.0598 | 0.01029  | K.GGETSEMYLIQPDTSSKP.YR.V   |                          |
|    |              |              | 2.62E-05 | 3.02, 2 | 0.43   | 1239.5177 | 0.00395  | K.EDGGGWYNR.C               |                          |
|    |              |              | 1.39E-11 | 4.46, 2 | 0.61   | 1671.7777 | -0.02876 | K.YC*GLPGEYWLGNK.I          | Carbamidomethylation (C) |
|    |              |              | 2.88E-05 | 3.18, 2 | 0.41   | 1689.8403 | 0.00524  | R.IGPTELLIEM#EDWK.G         | Oxidation (M)            |
|    |              |              | 9.86E-11 | 4.70, 2 | 0.57   | 2009.9298 | 0.00456  | K.DNENVINEYSSILEDQK.L       |                          |
| 28 | <i>Fhl1</i>  | gi 4894849   | 5.93E-07 | 10.91   |        |           |          |                             |                          |
|    |              |              | 5.93E-07 | 3.17, 2 | 0.54   | 1306.6637 | 0.00591  | K.AIVAGDQNVEYK.G            |                          |
| 29 | <i>Ganab</i> | gi 109463536 | 7.22E-11 | 50.26   |        |           |          |                             |                          |
|    |              |              | 2.70E-07 | 3.07, 2 | 0.60   | 1104.6776 | 0.00798  | K.LVAIVDPHIK.V              |                          |
|    |              |              | 7.25E-05 | 2.76, 3 | 0.46   | 1317.7274 | 0.00653  | R.SGGIERPFVLSR.A            |                          |
|    |              |              | 1.81E-04 | 2.77, 2 | 0.24   | 1140.6372 | 0.00835  | R.IRIDELEPR.R               |                          |
|    |              |              | 3.94E-04 | 3.26, 3 | 0.50   | 1636.7489 | 0.01090  | K.AEKDEPGAWEEETFK.T         |                          |
|    |              |              | 7.22E-10 | 3.71, 2 | 0.60   | 1323.7268 | 0.00969  | R.VPDVLVADPATAR.L           |                          |
| 31 | <i>Gpx3</i>  | P23764       | 7.01E-11 | 70.23   |        |           |          |                             |                          |
|    |              |              | 7.83E-05 | 2.62, 2 | 0.33   | 1060.4801 | 0.00086  | K.M#DILSYM#R.R              | Oxidation (M)            |
|    |              |              | 7.01E-11 | 4.67, 2 | 0.60   | 1555.7838 | -0.03100 | K.NSC*PPTAELLGSPGR.L        | Carbamidomethylation (C) |
|    |              |              | 5.86E-05 | 2.70, 2 | 0.39   | 1540.7852 | 0.00249  | K.QEPGENSEILPSLK.Y          |                          |
|    |              |              | 5.62E-04 | 2.88, 2 | 0.17   | 1044.4852 | 0.00125  | K.M#DILSYM.R                | Oxidation (M)            |
|    |              |              | 4.21E-09 | 3.50, 2 | 0.45   | 1330.7187 | 0.00200  | K.FLVGPDGIPIM#R.W           | Oxidation (M)            |
|    |              |              | 1.94E-04 | 2.93, 2 | 0.33   | 1028.4903 | 0.00066  | K.MDILSYM.R                 |                          |
|    |              |              | 9.53E-05 | 2.89, 2 | 0.28   | 1314.7238 | -0.00044 | K.FLVGPDGIPIMR.W            |                          |
| 32 | <i>Gsta6</i> | Q6AXY0       | 1.06E-09 | 10.81   | 20.23  |           |          |                             |                          |
|    |              |              | 1.06E-09 | 4.55, 2 | 0.63   | 1592.7703 | 0.00701  | K.VFESHGQDYLVGNK.L          |                          |
|    |              |              | 7.91E-04 | 2.87, 2 | 0.31   | 1245.6109 | 0.00420  | K.FIHTNEDLEK.L              |                          |
| 33 | <i>Hadha</i> | gi 148747393 | 2.07E-13 | 18.20   | 110.29 |           |          |                             |                          |

|    |              |                |          |       |         |      |            |          |                            |                          |
|----|--------------|----------------|----------|-------|---------|------|------------|----------|----------------------------|--------------------------|
|    |              |                | 1.66E-09 |       | 5.86, 3 | 0.65 | 1846.9180  | 0.00596  | R.LPAKPEVSSDEDIQYR.V       |                          |
|    |              |                | 2.07E-13 |       | 4.55, 2 | 0.64 | 1846.9180  | 0.01482  | R.LPAKPEVSSDEDIQYR.V       |                          |
|    |              |                | 4.08E-06 |       | 4.41, 2 | 0.55 | 1132.6208  | 0.00884  | K.DTTASAVAVGLK.Q           |                          |
|    |              |                | 1.14E-08 |       | 3.82, 2 | 0.59 | 1781.8188  | 0.03520  | K.TGLEQGNDAGYLAESEK.F      |                          |
|    |              |                | 1.38E-04 |       | 3.35, 2 | 0.42 | 1040.5411  | 0.00762  | R.FVDLYGAQK.V              |                          |
|    |              |                | 3.98E-05 |       | 3.32, 2 | 0.49 | 1149.5575  | 0.01909  | K.GFYIYQSGSK.N             |                          |
|    |              |                | 4.42E-04 |       | 3.27, 2 | 0.28 | 878.4981   | 0.01305  | K.FGELALTK.E               |                          |
|    |              |                | 6.70E-10 |       | 3.47, 2 | 0.57 | 1643.7589  | 0.02430  | K.M#VGVPAAAFDM#M#LTGR.N    | Oxidation (M)            |
|    |              |                | 3.44E-08 |       | 3.59, 2 | 0.55 | 1414.7398  | 0.02249  | K.LTSYAM#TIPFVR.Q          | Oxidation (M)            |
|    |              |                | 5.74E-04 |       | 3.37, 2 | 0.27 | 1320.7079  | -0.04222 | K.M#QLLEIITTDK.T           | Oxidation (M)            |
|    |              |                | 7.26E-07 |       | 3.62, 2 | 0.56 | 1667.9036  | 0.02999  | K.M#GLVDQLVDPLGPGIK.S      | Oxidation (M)            |
| 35 | <i>Hsp47</i> | P29457         | 7.83E-07 |       | 50.20   |      |            |          |                            |                          |
|    |              |                | 1.79E-05 |       | 3.13, 2 | 0.36 | 1224.65833 | 0.00163  | K.GVVEVTHDLQK.H            |                          |
|    |              |                | 4.13E-05 |       | 2.82, 2 | 0.36 | 1294.71875 | 0.00163  | K.LQLVEM#PLAHK.L           | Oxidation (M)            |
|    |              |                | 1.03E-05 |       | 3.56, 2 | 0.51 | 1337.74231 | 0.00408  | K.HLAGLGLTEAIDK.N          |                          |
|    |              |                | 1.34E-06 |       | 3.82, 2 | 0.58 | 1503.75118 | 0.00632  | R.STGLAFSLYQAM#AK.D        | Oxidation (M)            |
|    |              |                | 7.83E-07 |       | 4.09, 2 | 0.53 | 1306.67505 | 0.00020  | R.DNQSGSLLFIGR.L           |                          |
| 36 | <i>Hp</i>    | P06866         | 2.44E-08 | 14.99 | 60.25   |      |            |          |                            |                          |
|    |              |                | 3.42E-05 |       | 2.96, 2 | 0.57 | 1123.5088  | 0.00197  | K.DWVQETM#AK.N             | Oxidation (M)            |
|    |              |                | 9.75E-06 |       | 3.37, 2 | 0.57 | 1028.4618  | 0.00149  | R.M#GYVSGWGR.N             | Oxidation (M)            |
|    |              |                | 2.38E-06 |       | 3.23, 2 | 0.49 | 1308.6504  | 0.00455  | K.YVM#LPVADQEK.C           | Oxidation (M)            |
|    |              |                | 2.44E-08 |       | 5.04, 2 | 0.61 | 1378.8053  | 0.00066  | K.GAVSPVGVQPILNK.H         |                          |
|    |              |                | 2.79E-08 |       | 2.86, 2 | 0.38 | 1392.6566  | 0.00310  | K.YVMLPVADQEK.C            |                          |
|    |              |                | 2.46E-04 |       | 1.98, 1 | 0.31 | 943.5822   | 0.00159  | R.SVVDIGLIK.L              |                          |
| 37 | <i>Igc</i>   | gi 409675<br>4 | 1.29E-07 | 12.62 | 20.22   |      |            |          |                            |                          |
|    |              |                | 1.29E-07 |       | 3.18, 2 | 0.53 | 1536.7097  | 0.00378  | K.DSTYSM#SSTLSLTK.V        | Oxidation (M)            |
|    |              |                | 4.57E-07 |       | 3.64, 2 | 0.56 | 1378.6333  | 0.00139  | R.DGVLDSVTDQDSK.D          |                          |
| 39 | <i>Lamb2</i> | P15800         | 2.02E-12 | 13.38 | 190.27  |      |            |          |                            |                          |
|    |              |                | 5.24E-07 |       | 4.70, 2 | 0.51 | 1473.7295  | 0.04766  | K.NTEQTLQQVQER.M           |                          |
|    |              |                | 2.51E-10 |       | 4.17, 3 | 0.57 | 1878.8787  | 0.03617  | R.AGNSLAASTAEETAGSAQSR.A   |                          |
|    |              |                | 2.02E-12 |       | 4.95, 2 | 0.69 | 1878.8787  | 0.07244  | R.AGNSLAASTAEETAGSAQSR.A   |                          |
|    |              |                | 6.38E-12 |       | 2.88, 2 | 0.52 | 1974.8906  | -0.00570 | R.GTVPGGTPC*DSSSGTC*FC*K.R | Carbamidomethylation (C) |
|    |              |                | 2.91E-08 |       | 4.23, 2 | 0.59 | 1609.7340  | 0.02861  | R.LQELEGTYEENER.E          |                          |
|    |              |                | 3.39E-06 |       | 3.60, 2 | 0.50 | 1434.7074  | -0.04044 | R.C*TC*NLLGTDQQR.C         | Carbamidomethylation (C) |
|    |              |                | 2.48E-05 |       | 4.75, 3 | 0.33 | 1671.8660  | 0.02597  | R.QKAETVQAALAEAQR.A        |                          |
|    |              |                | 1.66E-05 |       | 4.06, 2 | 0.29 | 1144.6506  | 0.02601  | K.LGM#VQAIVAAR.N           | Oxidation (M)            |

|    |               |              |          |       |         |      |           |          |                          |                          |
|----|---------------|--------------|----------|-------|---------|------|-----------|----------|--------------------------|--------------------------|
|    |               |              | 4.76E-06 |       | 3.24, 2 | 0.42 | 1071.6157 | 0.01689  | R.ALVEGGGILSR.V          |                          |
|    |               |              | 4.11E-08 |       | 4.31, 2 | 0.58 | 1359.7379 | 0.03118  | R.IQNVVTSFAPQR.R         |                          |
|    |               |              | 1.62E-05 |       | 3.87, 2 | 0.32 | 1415.7125 | -0.01179 | K.AETVQAALEEAQR.A        |                          |
|    |               |              | 1.24E-11 |       | 4.31, 2 | 0.36 | 1771.8385 | 0.04045  | R.YSEIEPSTEGEVIYR.V      |                          |
|    |               |              | 1.27E-06 |       | 4.10, 2 | 0.59 | 1465.7409 | 0.01230  | R.GSC*YPATGDLLVGR.A      | Carbamidomethylation (C) |
|    |               |              | 2.22E-04 |       | 3.40, 2 | 0.44 | 1125.5608 | 0.01622  | R.AM#DYDLLLR.W           | Oxidation (M)            |
|    |               |              | 1.73E-05 |       | 3.27, 2 | 0.48 | 1267.6065 | 0.01848  | R.DGFFGLSASNPR.G         |                          |
|    |               |              | 6.48E-07 |       | 3.95, 2 | 0.51 | 2096.9440 | 0.04596  | K.DFLSQEGADPDSIEM#VATR.V | Oxidation (M)            |
|    |               |              | 2.09E-06 |       | 3.62, 2 | 0.37 | 1109.5659 | 0.01616  | R.AMDYDLLLR.W            |                          |
|    |               |              | 8.16E-04 |       | 3.84, 3 | 0.44 | 2096.9440 | 0.03045  | K.DFLSQEGADPDSIEM#VATR.V | Oxidation (M)            |
| 40 | <i>Ldhb</i>   | P42123       | 6.20E-09 | 11.7  | 30.17   |      |           |          |                          |                          |
|    |               |              | 1.59E-08 |       | 3.38, 2 | 0.61 | 1248.6306 | -0.02525 | R.VIGSGC*NLDSAR.F        | Carbamidomethylation (C) |
|    |               |              | 6.20E-09 |       | 2.99, 2 | 0.56 | 1666.8646 | 0.00810  | K.LIAPVADDETA VPNNK.I    |                          |
| 41 | <i>Madl</i>   | gi 109496662 | 2.32E-11 | 9.60  | 60.22   |      |           |          |                          |                          |
|    |               |              | 1.63E-04 |       | 2.75, 2 | 0.31 | 1201.6423 | -0.00593 | R.LKVEELEGER.S           |                          |
|    |               |              | 5.36E-05 |       | 2.94, 2 | 0.33 | 1078.5639 | 0.00054  | R.SLNNFISQR.M            |                          |
|    |               |              | 7.70E-04 |       | 2.89, 2 | 0.19 | 1007.5520 | 0.00170  | K.SYLIQVER.E             |                          |
|    |               |              | 7.13E-04 |       | 3.52, 3 | 0.41 | 1690.8567 | 0.00338  | K.M#QEALVDLELEKEK.L      | Oxidation (M)            |
|    |               |              | 2.32E-11 |       | 4.41, 2 | 0.62 | 1696.8752 | 0.00102  | R.GGPIPADLEAASSLPSSK.E   |                          |
|    |               |              | 1.47E-07 |       | 3.62, 2 | 0.43 | 1253.6195 | 0.00151  | K.MQLLETEFSR.S           |                          |
| 43 | <i>Mapl</i>   | P01048       | 2.79E-11 | 11.20 | 60.27   |      |           |          |                          |                          |
|    |               |              | 3.82E-04 |       | 4.00, 3 | 0.43 | 1295.7106 | 0.00125  | K.HTHLFALTEVK.S          |                          |
|    |               |              | 3.65E-04 |       | 2.19, 2 | 0.39 | 1111.5993 | 0.00115  | R.NIPVDSPELK.E           |                          |
|    |               |              | 5.59E-05 |       | 2.96, 2 | 0.35 | 1295.7106 | -0.00435 | K.HTHLFALTEVK.S          |                          |
|    |               |              | 2.66E-06 |       | 3.89, 2 | 0.49 | 1258.6313 | -0.00154 | K.KDGAETLYSFK.Y          |                          |
|    |               |              | 9.60E-06 |       | 3.66, 2 | 0.41 | 1130.5363 | -0.00068 | K.DGAETLYSFK.Y           |                          |
|    |               |              | 3.91E-04 |       | 2.56, 1 | 0.37 | 1130.5363 | -0.00012 | K.DGAETLYSFK.Y           |                          |
|    |               |              | 1.71E-06 |       | 5.05, 3 | 0.56 | 1944.9814 | 0.00016  | K.KYNAELESQFNQFLLYR.V    |                          |
|    |               |              | 2.79E-11 |       | 4.88, 2 | 0.59 | 1816.8864 | -0.00300 | K.YNAELESQFNQFLLYR.V     |                          |
|    |               |              | 6.08E-10 |       | 4.70, 3 | 0.48 | 1816.8864 | -0.00161 | K.YNAELESQFNQFLLYR.V     |                          |
| 44 | <i>Mpz</i>    | P06907       | 1.99E-07 | 13.30 | 30.19   |      |           |          |                          |                          |
|    |               |              | 1.12E-06 |       | 3.58, 2 | 0.42 | 1164.6047 | 0.00090  | R.DAISIFHYAK.G           |                          |
|    |               |              | 1.99E-07 |       | 2.75, 2 | 0.65 | 1353.6684 | 0.00151  | K.GQPYIDEVGTFK.E         |                          |
|    |               |              | 2.85E-7  |       | 3.49, 2 | 0.61 | 1314.6939 | 0.00188  | K.TSQVTLYVFEK.V          |                          |
| 45 | <i>Otud6b</i> | gi 157820311 | 1.39E-08 | 7.72  | 20.21   |      |           |          |                          |                          |
|    |               |              | 1.37E-06 |       | 2.75, 2 | 0.40 | 1303.6851 | 0.00481  | R.EQDSALTVATLR.R         |                          |



|    |                  |                 |           |       |         |      |           |          |                            |                          |
|----|------------------|-----------------|-----------|-------|---------|------|-----------|----------|----------------------------|--------------------------|
|    |                  |                 | 1.39E-08  |       | 4.05, 2 | 0.52 | 1372.7066 | 0.00176  | R.IAEAEIENLSGAR.H          |                          |
| 46 | <i>Prelp</i>     | gi 479389<br>87 | 1.88E-08  | 18.00 | 60.21   |      |           |          |                            |                          |
|    |                  |                 | 2.54E-07  |       | 3.85, 2 | 0.43 | 1586.8172 | 0.02495  | K.LEHLYLNNNSIEK.I          |                          |
|    |                  |                 | 1.30E-06  |       | 4.11, 2 | 0.39 | 1352.7168 | 0.01409  | K.NQLEEVPSALPR.N           |                          |
|    |                  |                 | 4.19E-05  |       | 2.78, 2 | 0.36 | 1154.6092 | 0.00884  | K.IETIPSGYFK.D             |                          |
|    |                  |                 | 5.08E-08  |       | 4.26, 3 | 0.45 | 1590.8962 | 0.01487  | K.LENLLLLDLQHNR.L          |                          |
|    |                  |                 | 1.88E-08  |       | 3.89, 2 | 0.59 | 1283.6704 | 0.01641  | K.LPGLAFLYM#DK.N           | Oxidation (M)            |
|    |                  |                 | 2.70E-04  |       | 3.03, 2 | 0.34 | 1092.5836 | 0.01506  | K.DFPNLA FIR.M             |                          |
| 47 | <i>Psemb4</i>    | P34067          | 3.55E-14  | 15.95 | 40.28   |      |           |          |                            |                          |
|    |                  |                 | 1.84E-05  |       | 2.77, 2 | 0.21 | 1022.5517 | 0.00249  | R.FQVATVTEK.G              |                          |
|    |                  |                 | 1.23E-04  |       | 2.83, 2 | 0.27 | 983.5421  | 0.00121  | R.AIHSWLTR.A               |                          |
|    |                  |                 | 1.31E-06  |       | 4.78, 3 | 0.18 | 2210.9910 | 0.00400  | R.VNDSTM#LGASGDYADFQYLK.Q  | Oxidation (M)            |
|    |                  |                 | 1.07E-12  |       | 5.69, 2 | 0.65 | 2210.9910 | 0.00780  | R.VNDSTM#LGASGDYADFQYLK.Q  | Oxidation (M)            |
|    |                  |                 | 3.55E-014 |       | 5.66, 2 | 0.61 | 2194.9960 | 0.00273  | R.VNDSTMLGASGDYADFQYLK.Q   |                          |
| 48 | <i>Puf60</i>     | Q9WV25          |           |       |         |      |           |          |                            |                          |
|    |                  |                 | 2.35E-06  | 9.40  | 40.15   |      |           |          |                            |                          |
|    |                  |                 | 7.08E-05  |       | 2.81, 2 | 0.36 | 1359.6638 | 0.02007  | K.QGEEEDA EIIVK.I          |                          |
|    |                  |                 | 2.19E-04  |       | 2.90, 2 | 0.49 | 1105.5200 | 0.01213  | K.GYGFIEYEK.A              |                          |
|    |                  |                 | 2.35E-06  |       | 2.78, 2 | 0.55 | 1761.9744 | 0.03520  | K.LGLPLTPEQQEALQK.A        |                          |
|    |                  |                 | 5.48E-05  |       | 2.83, 2 | 0.46 | 1823.7792 | -0.01397 | K.DIDDDLEGEVTEEC*GK.F      | Carbamidomethylation (C) |
| 51 | <i>Serpina3n</i> | P09006          | 1.89E-14  | 30.90 | 90.30   |      |           |          |                            |                          |
|    |                  |                 | 1.85E-05  |       | 2.96, 2 | 0.35 | 1079.6095 | 0.00322  | K.KLINDYVSK.Q              |                          |
|    |                  |                 | 1.88E-05  |       | 3.10, 2 | 0.34 | 1070.6568 | 0.00200  | K.IQGLITNLAK.K             |                          |
|    |                  |                 | 8.25E-07  |       | 3.37, 2 | 0.34 | 1204.6572 | 0.00347  | R.LQVLA EFQEK.A            |                          |
|    |                  |                 | 1.78E-08  |       |         |      |           |          | K.EVFSTQADLSGITGDKDLM#VSQV |                          |
|    |                  |                 |           |       | 4.69, 3 | 0.55 | 2820.4083 | 1.01761  | VHK.A                      | Oxidation (M)            |
|    |                  |                 | 2.89E-11  |       | 5.31, 2 | 0.65 | 1845.8765 | 0.00688  | K.ALYQAEAF TADFQQSR.E      |                          |
|    |                  |                 | 5.73E-07  |       | 4.63, 2 | 0.46 | 1677.8693 | 0.00749  | R.DEIQISTGNALFIEK.R        |                          |
|    |                  |                 | 4.36E-06  |       | 3.77, 2 | 0.50 | 1493.7708 | 0.00849  | K.TSM#VLVNYIYFK.G          | Oxidation (M)            |
|    |                  |                 | 5.97E-04  |       | 3.18, 2 | 0.44 | 1319.6511 | 0.00566  | K.GNSMEEILEGLK.F           |                          |
|    |                  |                 | 1.89E-14  |       | 4.98, 2 | 0.60 | 2123.0905 | 1.03008  | K.FSISADYNLEDVLP ELGIK.E   |                          |
| 54 | <i>Smc3</i>      | P97690          | 2.51E-09  | 5.70  | 50.22   |      |           |          |                            |                          |
|    |                  |                 | 2.31E-05  |       | 3.04, 2 | 0.53 | 1250.6375 | 0.00957  | R.VETYL NENLR.K            |                          |
|    |                  |                 | 2.51E-09  |       | 4.30, 2 | 0.50 | 1474.6768 | 0.03154  | K.DLQDELAGNSEQR.K          |                          |
|    |                  |                 | 2.73E-05  |       | 2.77, 2 | 0.29 | 1682.8383 | 0.04070  | K.ALDQFVNFSEQKEK.L         |                          |
|    |                  |                 | 7.59E-08  |       | 3.85, 2 | 0.57 | 1856.9024 | 0.05083  | R.ALEYTIYNQELNETR.A        |                          |
|    |                  |                 | 4.77E-09  |       | 2.85, 2 | 0.39 | 1765.8313 | 0.05303  | R.DTAYPETNDAIPMISK.L       |                          |
| 55 | <i>Snx1</i>      | Q99N27          | 9.48E-11  | 16.90 | 70.23   |      |           |          |                            |                          |

|    |              |        |          |       |         |      |           |          |                        |               |
|----|--------------|--------|----------|-------|---------|------|-----------|----------|------------------------|---------------|
|    |              |        | 3.61E-08 |       | 4.52, 3 | 0.49 | 1650.8268 | 0.00557  | R.IVNHPTM#LQDPDVR.E    | Oxidation (M) |
|    |              |        | 6.18E-08 |       | 3.34, 2 | 0.59 | 1317.6143 | 0.00911  | K.IGDGM#NAYVAYK.V      | Oxidation (M) |
|    |              |        | 4.94E-04 |       | 2.48, 2 | 0.29 | 1289.6735 | 0.00701  | R.EFLEKEELPR.A         |               |
|    |              |        | 4.91E-05 |       | 3.80, 2 | 0.54 | 1216.6419 | 0.00615  | R.ALSQLAEVEEK.I        |               |
|    |              |        | 9.48E-11 |       | 4.63, 2 | 0.59 | 1667.7904 | 0.00999  | K.SLAM#LGSSSEDNTALSR.A | Oxidation (M) |
|    |              |        | 6.28E-05 |       | 2.89, 2 | 0.46 | 1296.6616 | 0.00589  | K.VTTQTSLPM#FR.S       | Oxidation (M) |
|    |              |        | 1.62E-04 |       | 3.25, 2 | 0.48 | 1285.7474 | 0.00017  | R.AVGTQALSGAGLLK.M     |               |
| 57 | <i>Ywhag</i> | P61983 | 1.21E-09 | 13.80 | 20.25   |      |           |          |                        |               |
|    |              |        | 1.21E-09 |       | 5.10, 2 | 0.50 | 1643.7871 | 0.00334  | K.NVTELNEPLSNEER.N     |               |
|    |              |        | 2.27E-08 |       | 2.90, 2 | 0.63 | 2193.8803 | -0.00361 | R.DNLTLWTSQQDDDDGGEGNN |               |
|    |              |        | 6.27E-05 |       | 2.90, 2 | 0.25 | 907.5247  | 0.00127  | R.NLLSVAYK.N           |               |
|    |              |        | 2.30E-04 |       | 2.83, 2 | 0.23 | 1204.6516 | -0.00690 | K.DSTLIM#QLLR.D        | Oxidation (M) |

P (pro): The protein probability is the highest peptide probability that was found

P (pep): The peptide probability that the search could have produced a better match using a random sequence.

Coverage: The percentage of identified peptides

Score: This is the original Eng-Yates-Scoring, in which a primary match receives 10 points, a secondary match receives 8 points, a tertiary match gets 6 points, 4 points, 2 points, etc. The points for all the peptides are summed together. This was the original way of sorting a consensus report.

Xc: The cross correlation of the primary match. Xc (Cross Correlation) is a measure of the “goodness of fit” of a theoretical spectra created from the sequences b + y ions, along with water and amine losses compared to the actual MS/MS spectra acquired by the instrument.

$\Delta C_n$ : The delta correlation of the primary match being compared to the secondary match.

$\Delta M$ : The delta mass is the difference between the mass theoretical mass of the peptide identified and the actual mass measurement of the instrument.
