# Supplementary material
Source: PubMed Central journal article supplement (PMC2849705)
Supplement: supp_M900286-MCP200_SuppTable_1.pdf [file supp_M900286-MCP200_SuppTable_1.pdf]

Supplemental Table 1. STZ-induced diabetes and duration mediated erectile tissue protein profiles.

| No | Gene name            | Protein identities                              | Accession number | MW (kDa), pI <sup>1</sup> | Fold Change <sup>2</sup> |              |              |              | One way ANOVA <sup>3</sup> p-value | Two way ANOVA p-value <sup>4</sup> |          |          |
|----|----------------------|-------------------------------------------------|------------------|---------------------------|--------------------------|--------------|--------------|--------------|------------------------------------|------------------------------------|----------|----------|
|    |                      |                                                 |                  |                           | 2/1                      | 4/3          | 3/1          | 4/2          |                                    | Treatment                          | Time     | Interact |
| 1  | <i>A2U</i>           | alpha2u globulin                                | gi 66730407      | 20.74, 5.55               | <b>-4.77</b>             | <b>-5.2</b>  | -1.88        | -2.14        | 0.00086                            | 0.00031                            | 0.02     | 0.75     |
| 2  | <i>Alb</i>           | Albumin                                         | P002770          | 68.73, 6.09               | 1.34                     | <b>1.56</b>  | 1.34         | <b>1.56</b>  | 0.00012                            | 0.0004                             | 0.00036  | 0.33     |
| 3  | <i>Andpro (crp1)</i> | Cystatin-related protein 1 precursor            | P22282           | 21.06, 8.7                | <b>-2.31</b>             | <b>-2.75</b> | -3.24        | -3.86        | 7.0E-04                            | 0.0046                             | 6.4E-04  | 0.66     |
| 4  | <i>Apcs</i>          | seum amyloid P component                        | P23680           | 26.20, 5.4                | <b>2.04</b>              | <b>1.63</b>  | 1.48         | 1.18         | 3.9E-04                            | 0.00015                            | 0.024    | 0.29     |
| 5  | <i>Apeh</i>          | acyl-peptide hydrolase                          | P13676           | 80.95, 5.4                | 1.21                     | <b>1.55</b>  | 1.04         | 1.26         | 0.019                              | 0.0074                             | 0.14     | 0.31     |
| 6  | <i>apoA-I</i>        | Apolipoprotein A-I precursor                    | P04639           | 30.1, 5.5                 | <b>2.89</b>              | <b>3.39</b>  | 1.01         | 1.18         | 0.00013                            | 1.3E-05                            | 0.63     | 0.58     |
| 7  | <i>apoA-IV</i>       | Apolipoprotein A-IV                             | P02651           | 44.5, 4.98                | <b>2.24</b>              | <b>2.03</b>  | 1.21         | 1.1          | 0.00027                            | 4.0E-05                            | 0.17     | 0.6      |
| 8  | <i>apoE</i>          | Apolipoprotein E precursor                      | P02650           | 35.8, 5.2                 | <b>-1.97</b>             | -1.12        | <b>-2.21</b> | -1.26        | 0.011                              | 0.031                              | 0.018    | 0.1      |
| 9  | <i>Bpgm</i>          | 2,3-bisphosphoglycerate mutase                  | Q6P6G4           | 18.1, 6.6                 | <b>1.58</b>              | 1.18         | 1.38         | 1.03         | 0.011                              | 0.0069                             | 0.098    | 0.14     |
| 10 | <i>C3</i>            | Complement C3                                   | P01026           | 186.3, 6.1                | <b>1.63</b>              | <b>1.91</b>  | 1.18         | 1.38         | 0.0033                             | 0.00098                            | 0.072    | 0.61     |
| 11 | <i>C5</i>            | Complement C5                                   | gi 109468076     | 189.8, 6.1                | 1.2                      | <b>2.02</b>  | 1.35         | <b>2.15</b>  | 0.00051                            | 0.0023                             | 0.00081  | 0.093    |
| 12 | <i>Ca2</i>           | Carbonic anhydrase 2                            | P27139           | 29.09, 7.02               | <b>1.67</b>              | 1.11         | 1.31         | -1.15        | 0.012                              | 0.0098                             | 0.49     | 0.073    |
| 13 | <i>Car1</i>          | similar to Carbonic anhydrase I                 | gi 27689031      | 28.3, 6.9                 | <b>1.72</b>              | 1.17         | 1.46         | -1.01        | 0.031                              | 0.02                               | 0.19     | 0.14     |
| 14 | <i>Ccl-8</i>         | liver regeneration-related protein LRRG161      | gi 33086660      | 107.34, 8.35              | <b>-1.73</b>             | -1.14        | <b>-2.33</b> | <b>-1.54</b> | 0.0015                             | 0.12                               | 0.00039  | 0.06     |
| 15 | <i>Cct4</i>          | Chaperonin containing Tcp1, subunit 4 (delta)   | gi 50927753      | 58.09, 8.24               | 1.42                     | <b>1.85</b>  | <b>1.66</b>  | <b>2.13</b>  | 0.001                              | 0.01                               | 0.00075  | 0.35     |
| 16 | <i>Cct5</i>          | Chaperonin containing Tcp1, subunit 5 (epsilon) | Q6B436           | 59.49, 5.44               | 1.27                     | <b>1.72</b>  | -1.05        | 1.29         | 0.0372                             | 0.0034                             | 0.53     | 0.098    |
| 17 | <i>Coll4a1</i>       | Collagen, type XIV, alpha 1                     | gi 109480777     | 193.22, 4.9               | -1.11                    | <b>-1.68</b> | -1.11        | <b>-1.69</b> | 0.0032                             | 0.017                              | 0.0037   | 0.1      |
| 18 | <i>Coll1a1</i>       | Collagen, type 1, alpha 1                       | P02454           | 137.86, 5.7               | <b>-1.68</b>             | <b>-2.02</b> | <b>-2.57</b> | <b>-3.12</b> | 4.10E-05                           | 0.00056                            | 2.20E-05 | 0.34     |
| 19 | <i>Coll1a2</i>       | Collagen, type 1, alpha 2                       | P02466           | 129.48, 9.6               | <b>-1.96</b>             | <b>-2.04</b> | -2.62        | -1.41        | 0.0003                             | 0.021                              | 0.00026  | 0.013    |
| 20 | <i>Col6a2</i>        | Collagen, type 6, alpha 2                       | Q5EB88           | 109.5, 6.2                | <b>-1.52</b>             | <b>-2.02</b> | -1.7         | -1.15        | 0.0096                             | 0.04                               | 0.0067   | 0.084    |
| 21 | <i>Col6a3</i>        | Procollagen, type 6, alpha 3                    | gi 157817857     | 324.91, 5.8               | 1.32                     | <b>1.62</b>  | 1.3          | <b>1.6</b>   | 0.0035                             | 0.0022                             | 0.022    | 0.2      |
| 22 | <i>Crmp4</i>         | collapsin response mediator protein 4           | gi 14518293      | 61.92, 6.03               | 1.48                     | <b>2.09</b>  | 1.01         | 1.43         | 0.0002                             | 5.50E-05                           | 0.025    | 0.029    |
| 23 | <i>Ethel1</i>        | ethylmalonic encephalopathy 1                   | B0BNJ4           | 27.66, 6.6                | 1.21                     | <b>2.18</b>  | 1.36         | <b>2.44</b>  | 0.00063                            | 0.0029                             | 0.0003   | 0.041    |

Supplemental Table 1 continued

| Pos. | Gene name     | Protein identities                                          | Accession number | MW (kDa), pI <sup>1</sup> | Fold Change <sup>2</sup> |              |              |              | One way ANOVA <sup>3</sup> p-value | Two way ANOVA p-value <sup>4</sup> |          |          |
|------|---------------|-------------------------------------------------------------|------------------|---------------------------|--------------------------|--------------|--------------|--------------|------------------------------------|------------------------------------|----------|----------|
|      |               |                                                             |                  |                           | 2/1                      | 4/3          | 3/1          | 4/2          |                                    | Treatment                          | Time     | Interact |
| 24   | <i>Fetub</i>  | fetuin beta                                                 | Q9QX79           | 42.40, 6.7                | <b>1.51</b>              | <b>2.08</b>  | 1.06         | 1.45         | 0.00056                            | 0.00015                            | 0.0519   | 0.15     |
| 25   | <i>Fga</i>    | Fibrinogen alpha chain precursor                            | P06399           | 61.00, 7.8                | 1.34                     | <b>1.81</b>  | <b>1.84</b>  | <b>2.49</b>  | 0.00025                            | 0.0092                             | 0.00012  | 0.31     |
| 26   | <i>Fgb</i>    | Fibrinogen beta chain precursor                             | P14480           | 54.80, 8.2                | 1.37                     | <b>1.63</b>  | 1.35         | <b>1.6</b>   | 0.0034                             | 0.0064                             | 0.0058   | 0.47     |
| 27   | <i>Fgg</i>    | Fibrinogen gamma chain precursor                            | P02680           | 51.2, 5.4                 | 1.31                     | <b>2.03</b>  | 1.33         | <b>2.05</b>  | 0.0011                             | 0.0033                             | 0.0028   | 0.13     |
| 28   | <i>Fhl1</i>   | LIM protein                                                 | gi 4894849       | 31.88, 8.76               | -1.02                    | <b>-3.66</b> | 2.01         | -1.78        | 0.028                              | 0.027                              | 0.69     | 0.021    |
| 29   | <i>Ganab</i>  | alpha glucosidase 2 alpha neutral subunit                   | gi 109463536     | 109.39, 5.7               | <b>1.51</b>              | <b>1.79</b>  | 1.44         | <b>1.71</b>  | 9.6E-05                            | 0.0002                             | 0.00041  | 0.46     |
| 30   | <i>Gda</i>    | guanine deaminase                                           | gi 7533042       | 51.50, 5.5                | 1.08                     | <b>1.68</b>  | -1.14        | 1.37         | 0.0075                             | 0.0034                             | 0.32     | 0.015    |
| 31   | <i>Gpx3</i>   | glutathione peroxidase 3                                    | P23764           | 25.25, 8.2                | <b>1.73</b>              | 1.71         | 1.09         | -1           | 0.025                              | 0.004                              | 0.86     | 0.64     |
| 32   | <i>Gsta6</i>  | Glutathione S-transferase A6                                | Q6AXY0           | 25.79, 5.9                | <b>-1.69</b>             | -1.09        | <b>-1.59</b> | 1.02         | 0.0024                             | 0.0069                             | 0.023    | 0.016    |
| 33   | <i>Hadha</i>  | mitochondrial trifunctional protein, alpha subunit          | gi 148747393     | 82.66, 9.16               | 1.22                     | <b>2.08</b>  | -1.09        | <b>1.57</b>  | 0.003                              | 0.0014                             | 0.089    | 0.024    |
| 34   | <i>Hbb</i>    | Hemoglobin subunit beta-1                                   | P02091           | 15.90, 8.2                | <b>1.68</b>              | 2.27         | -1.25        | -1.3         | 0.012                              | 0.0047                             | 0.038    | 0.33     |
| 35   | <i>Hsp47</i>  | Heat shock protein 47                                       | P29457           | 46.6, 9.2                 | <b>-2.94</b>             | <b>-7.79</b> | <b>-6.09</b> | <b>-4.17</b> | 9.30E-07                           | 9.30E-05                           | 5.20E-07 | 0.29     |
| 36   | <i>Hp</i>     | Haptoglobin                                                 | P06866           | 38.53, 6.1                | -1.13                    | 2.23         | 1.9          | <b>4.76</b>  | 0.0011                             | 0.34                               | 0.00038  | 0.052    |
| 37   | <i>Hpx</i>    | Hemopexin                                                   | P20059           | 52.00, 7.9                | 1.52                     | <b>2.35</b>  | <b>1.82</b>  | <b>2.81</b>  | 0.00011                            | 0.0011                             | 0.00014  | 0.2      |
| 38   | <i>Igc</i>    | anti-NGF30 antibody light-chain                             | gi 4096754       | 23.80, 5.9                | <b>1.86</b>              | <b>2.02</b>  | 1.66         | 1.69         | 0.0015                             | 0.0018                             | 0.0053   | 0.99     |
| 39   | <i>Lamb2</i>  | Laminin subunit beta-2 precursor                            | P15800           | 196.34, 6.3               | <b>-1.73</b>             | -1.69        | <b>-2.02</b> | -1.53        | 0.0033                             | 0.011                              | 0.0026   | 0.28     |
| 40   | <i>Ldhb</i>   | <i>lactate dehydrogenase B</i>                              | P42123           | 36.58, 5.65               | <b>1.57</b>              | <b>1.56</b>  | 1.18         | 1.04         | 0.0059                             | 0.0012                             | 0.24     | 0.54     |
| 41   | <i>Imna</i>   | Lamin-A                                                     | P48679           | 71.9, 6.20                | 1.15                     | <b>2.32</b>  | -1.26        | 1.6          | 0.034                              | 0.038                              | 0.71     | 0.10     |
| 42   | <i>Mad1</i>   | similar to Mitotic spindle assembly checkpoint protein MAD1 | gi 109496662     | 83.27, 5.51               | 1.26                     | 1.53         | 1.44         | <b>1.63</b>  | 0.0018                             | 0.015                              | 0.0011   | 0.55     |
| 43   | <i>Map1</i>   | T-kininogen 1 precursor                                     | P01048           | 46.90, 6.0                | <b>2.29</b>              | <b>2.21</b>  | <b>7.17</b>  | <b>6.91</b>  | 1.60E-05                           | 0.0028                             | 4.20E-06 | 0.76     |
| 44   | <i>Mpz</i>    | myelin protein zero                                         | P06907           | 27.65, 9.8                | <b>1.99</b>              | <b>1.8</b>   | 1.35         | 1.22         | 8.5E-06                            | 2.30E-06                           | 0.0043   | 0.55     |
| 45   | <i>Otud6b</i> | OTU domain containing 6B                                    | gi 157820311     | 37.08, 5.9                | 1.37                     | <b>1.68</b>  | <b>1.74</b>  | <b>2.03</b>  | 1.40E-05                           | 0.00058                            | 9.10E-06 | 0.45     |

Supplemental Table 1 continued

| Pos. | Gene name        | Protein identities                                           | Accession number | MW (KDa), pI <sup>1</sup> | Fold Change <sup>2</sup> |              |              |             | One way ANOVA <sup>3</sup> p-value | Two way ANOVA p-value <sup>4</sup> |           |          |
|------|------------------|--------------------------------------------------------------|------------------|---------------------------|--------------------------|--------------|--------------|-------------|------------------------------------|------------------------------------|-----------|----------|
|      |                  |                                                              |                  |                           | 2/1                      | 4/3          | 3/1          | 4/2         |                                    | Treatment                          | Time      | Interact |
| 46   | <i>Prelp</i>     | Proline arginine-rich end leucine-rich repeat protein        | gi 47938987      | 43.12, 9.8                | <b>-2.2</b>              | -1.04        | -1.47        | 1.47        | 0.0096                             | 0.0091                             | 0.94      | 0.0056   |
| 47   | <i>Psmb4</i>     | proteasome (prosome, macropain) subunit, beta type 4         | P34067           | 25.77, 6.4                | 1.19                     | <b>-2.14</b> | 1.34         | <b>-1.9</b> | 0.0076                             | 0.035                              | 0.20      | 0.0029   |
| 48   | <i>Puf60</i>     | Poly(U)-binding-splicing factor PUF60                        | Q9WV25           | 59.77, 5.4                | 1.87                     | <b>2..5</b>  | 1.27         | 1.69        | 0.0071                             | 0.0026                             | 0.074     | 0.53     |
| 49   | <i>Pzp</i>       | pregnancy-zone protein                                       | Q63041           | 168.4, 6.46               | <b>2.19</b>              | <b>1.75</b>  | <b>1.58</b>  | 1.26        | 0.00016                            | 3.70E-05                           | 0.014     | 0.56     |
| 50   | <i>Serpinal</i>  | Serine protease inhibitor alpha 1                            | P17475           | 46.3, 5.5                 | 2.33                     | <b>2.74</b>  | 1.91         | 2.25        | 0.0036                             | 0.0035                             | 0.011     | 0.81     |
| 51   | <i>Serpina3n</i> | Serine (or cysteine) peptidase inhibitor, clade A, member 3N | P09006           | 46.6, 5.19                | 1.84                     | <b>3.40</b>  | 1.17         | 2.16        | 0.0012                             | 0.00049                            | 0.041     | 0.16     |
| 52   | <i>Serpinf1</i>  | Alpha-2 antiplasmin                                          | Q80ZA3           | 46.50, 6.0                | 1.61                     | <b>2.42</b>  | 1.64         | <b>2.47</b> | 0.00021                            | 0.00031                            | 0.0012    | 0.088    |
| 53   | <i>sid23p</i>    | similar to sid23p                                            | gi 27703460      | 18.60, 7.7                | -1.08                    | -1.55        | <b>2.85</b>  | <b>1.98</b> | 0.00066                            | 0.11                               | 8.500E-05 | 0.29     |
| 54   | <i>Smc3</i>      | Structural maintenance of chromosomes protein 3              | P97690           | 138.36, 7.8               | -1.19                    | <b>1.77</b>  | <b>-1.66</b> | 1.12        | 0.017                              | 0.28                               | 0.057     | 0.009    |
| 55   | <i>Snx1</i>      | sorting nexin 1                                              | Q99N27           | 59.0, 5.0                 | 1.11                     | <b>1.53</b>  | 1.2          | <b>1.66</b> | 0.0009                             | 0.0083                             | 0.0012    | 0.069    |
| 56   | <i>Tf</i>        | Serotransferrin                                              | P12346           | 78.1, 8.2                 | <b>1.59</b>              | <b>2.19</b>  | 1.32         | <b>1.63</b> | 0.00054                            | 0.00041                            | 0.0057    | 0.39     |
| 57   | <i>Ywhag</i>     | 14-3-3 protein gamma                                         | P61983           | 28.30, 4.80               | <b>1.97</b>              | <b>1.47</b>  | 1.3          | -1.03       | 0.00045                            | 9.90E-05                           | 0.18      | 0.16     |

<sup>1</sup>The theoretical molecular weight (MW) and isoelectric point (pI) were calculated using ExPASy compute pI/Mw tool from the data base entries.

<sup>2,3,4</sup> The difference in the standardized abundance for the proteins between the groups are expressed as fold change that are calculated by taking the means of standardized volume values, from four independent biological replicates per group, for the protein spot in the corresponding group (Group 1 = one week control, Group 2 = one week STZ-induced diabetic, Group 3 = two months control, Group 4 = two months STZ-induced diabetic), Values are displayed in the range of  $-\infty$  to -1 for decreases in expression and +1 to  $+\infty$  for increases in expression. One-way and two-way analysis of variances (ANOVA) p-values calculated using DeCyder software version 6.5.

<sup>a</sup> Boldface for ratios indicating statistically significant fold changes ( $p \leq 0.05$ ).
